# Supplementary material
Source: MDPI journal article supplement (https://www.mdpi.com/2079-9292/11/23/3887)
Supplement: s1 [file s1]

## Supplementary Data

# Color and Texture Analysis of Textiles Using Image Acquisition and Spectral Analysis in Calibrated Sphere Imaging System-I

Nibedita Rout <sup>1</sup>, George Baciuc<sup>2</sup>, Priyabrata Pattanaik<sup>1</sup>, K. Nakkeeran<sup>3,\*</sup> and Asimananda Khandual<sup>4,\*</sup><sup>1</sup> School of Electronics, ITER, S'O'A University, Bhubaneswar-751030, Odisha, India<sup>2</sup> Department of Computing, The Hong Kong Polytechnic University, Hung Hom, Kowloon, Hong Kong, China<sup>3</sup> School of Engineering, Fraser Noble Building, University of Aberdeen, Aberdeen AB24 3UE, UK<sup>4</sup> Department of Textile Engineering, OTR (Former CET), Bhubaneswar -751029, Odisha, India

\* Correspondence: k.nakkeeran@abdn.ac.uk (K.N.); asimte@cet.edu.in (A.K.); Tel.: +91-9658728145 (A.K.)

**Abstract:** Numerous imaging applications and analyses demand human perception, and color space transformation of device-dependent tri-band color interpretation (RGB) to device-independent CIE color space standards needs human intervention. The imaging acquisition environment, theoretical conversion errors, viewing geometry, well-defined illumination uniformity, and calibration protocols limit their precision and applicability. It is unfortunate that in most image processing applications, the spectral data are either unavailable or immeasurable. This study is based on developing a novel integrating sphere imaging system and experimentation with textiles' controlled variation of texture and color. It proposes a simple calibration technique and describes how unique digital color signatures can be derived from calibrated RGB derivatives to extract the best features for color and texture. Additionally, an alter-ego of reflectance function, missing in the imaging domain, is suggested that could be helpful for visualization, identification, and application for qualitative and quantitative color-texture analysis. Our further investigation revealed promising colorimetric results while validating color characterization and different color combinations over three textures.

**Keywords:** computer vision; CIE color space; color image processing; radiance; tri-stimulus value; d/80 geometry; integrating sphere imaging

**Citation:** Rout, N.; Baciuc, G.; Pattanaik, P.; K. Nakkeeran; Khandual, A. Color and Texture Analysis of Textiles Using Image Acquisition and Spectral Analysis in Calibrated Sphere Imaging System-I. *Electronics* **2022**, *11*, 3887. <https://doi.org/10.3390/electronics11233887>

Academic Editors: Leonardo Galteri; Claudio Ferrari; Stefanos Kollias

Received: 12 October 2022

Accepted: 18 November 2022

Published: 24 November 2022

**Publisher's Note:** MDPI stays neutral with regard to jurisdictional claims in published maps and institutional affiliations.

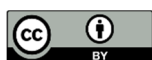

**Copyright:** © 2022 by the authors. Licensee MDPI, Basel, Switzerland. This article is an open access article distributed under the terms and conditions of the Creative Commons Attribution (CC BY) license (<https://creativecommons.org/licenses/by/4.0/>).

[ Figure S1. Proximity textures : 20 kinds of fabric from the same cotton fibres (only texture is varied in close proximity by spinning for making yarn and weaving for the fabric development) ]

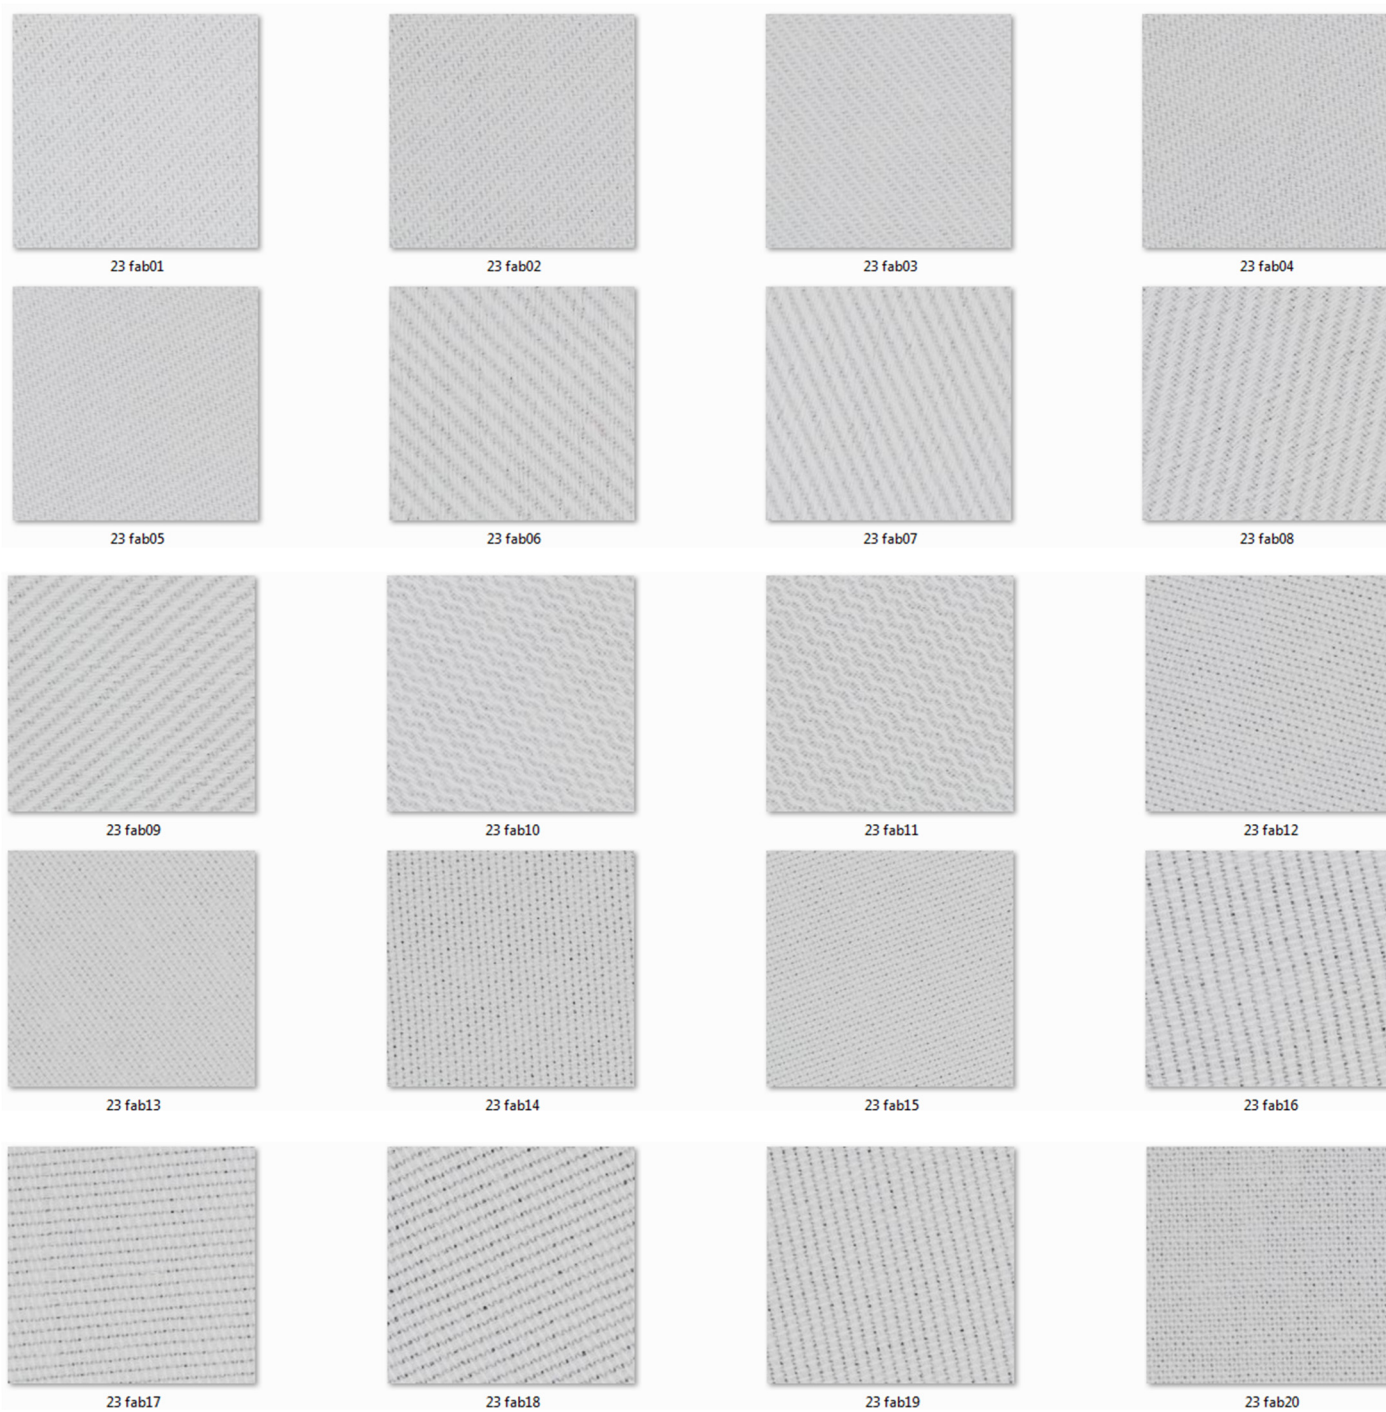

[ Table S1. Calibrated RGB Readings of 20 fabric samples ]

|                         | R       | G       | B       | Intensity | r     | g     | b     | rg    | rb    | gb    | rgb   |
|-------------------------|---------|---------|---------|-----------|-------|-------|-------|-------|-------|-------|-------|
| White Calibration plate | 242.133 | 243.864 | 242.999 | 242.999   | 1.000 | 1.000 | 1.000 | 1.000 | 1.000 | 1.000 | 1.000 |
| sample 1                | 212.042 | 212.471 | 214.420 | 212.978   | 0.876 | 0.871 | 0.882 | 0.763 | 0.773 | 0.773 | 0.673 |
| sample 2                | 205.926 | 205.990 | 207.990 | 206.635   | 0.850 | 0.845 | 0.856 | 0.718 | 0.728 | 0.728 | 0.615 |
| sample 3                | 207.632 | 207.632 | 209.616 | 208.293   | 0.858 | 0.851 | 0.863 | 0.730 | 0.740 | 0.740 | 0.630 |
| sample 4                | 205.118 | 205.115 | 207.116 | 205.783   | 0.847 | 0.841 | 0.852 | 0.713 | 0.722 | 0.722 | 0.607 |
| sample 5                | 207.305 | 207.305 | 208.457 | 207.689   | 0.856 | 0.850 | 0.858 | 0.728 | 0.734 | 0.734 | 0.624 |
| sample 6                | 207.205 | 207.179 | 207.477 | 207.287   | 0.856 | 0.850 | 0.854 | 0.727 | 0.731 | 0.731 | 0.621 |
| sample 7                | 209.289 | 209.289 | 210.349 | 209.643   | 0.864 | 0.858 | 0.866 | 0.742 | 0.748 | 0.748 | 0.642 |
| sample 8                | 206.337 | 206.337 | 206.653 | 206.442   | 0.852 | 0.846 | 0.850 | 0.721 | 0.725 | 0.725 | 0.613 |
| sample 9                | 207.295 | 207.295 | 209.161 | 207.917   | 0.856 | 0.850 | 0.861 | 0.728 | 0.737 | 0.737 | 0.626 |
| sample 10               | 208.066 | 208.066 | 209.010 | 208.381   | 0.859 | 0.853 | 0.860 | 0.733 | 0.739 | 0.739 | 0.631 |
| sample 11               | 206.000 | 206.041 | 206.091 | 206.044   | 0.851 | 0.845 | 0.848 | 0.719 | 0.722 | 0.722 | 0.610 |
| sample 12               | 203.539 | 203.539 | 205.488 | 204.188   | 0.841 | 0.835 | 0.846 | 0.702 | 0.711 | 0.711 | 0.593 |
| sample 13               | 205.340 | 205.340 | 205.340 | 205.340   | 0.848 | 0.842 | 0.845 | 0.714 | 0.717 | 0.717 | 0.603 |
| sample 14               | 201.459 | 201.464 | 201.803 | 201.575   | 0.832 | 0.826 | 0.830 | 0.687 | 0.691 | 0.691 | 0.571 |
| sample 15               | 205.244 | 205.246 | 205.282 | 205.257   | 0.848 | 0.842 | 0.845 | 0.713 | 0.716 | 0.716 | 0.603 |
| sample 16               | 204.727 | 204.728 | 206.689 | 205.381   | 0.846 | 0.840 | 0.851 | 0.710 | 0.719 | 0.719 | 0.604 |
| sample 17               | 205.376 | 205.376 | 205.570 | 205.441   | 0.848 | 0.842 | 0.846 | 0.714 | 0.718 | 0.718 | 0.604 |
| sample 18               | 202.741 | 202.741 | 203.054 | 202.845   | 0.837 | 0.831 | 0.836 | 0.696 | 0.700 | 0.700 | 0.582 |
| sample 19               | 203.762 | 203.768 | 204.079 | 203.870   | 0.842 | 0.836 | 0.840 | 0.703 | 0.707 | 0.707 | 0.591 |
| sample 20               | 198.767 | 198.767 | 199.928 | 199.154   | 0.821 | 0.815 | 0.823 | 0.669 | 0.675 | 0.675 | 0.550 |

[ Table S2. %R Reflectance &amp; CIE XYZ, L\*a\*,b\* readings of 20 fabric samples ]

| Sampl<br>eNo. | %<br>R 1  | 2         | 3         | 4         | 5         | 6         | 7         | 8         | 9         | 10        | 11        | 12        | 13        | 14        | 15        | 16        | 17        | 18        | 19        | 20        |
|---------------|-----------|-----------|-----------|-----------|-----------|-----------|-----------|-----------|-----------|-----------|-----------|-----------|-----------|-----------|-----------|-----------|-----------|-----------|-----------|-----------|
| <b>360</b>    | 62.<br>34 | 64.<br>11 | 63.<br>97 | 64.<br>22 | 63.<br>28 | 66.<br>59 | 63.<br>69 | 67.<br>03 | 65.<br>83 | 63.<br>89 | 62.<br>07 | 61.<br>45 | 62.<br>57 | 63.<br>77 | 64.<br>17 | 66.<br>58 | 61.<br>51 | 64.<br>85 | 61.<br>63 | 61.<br>52 |
| <b>370</b>    | 63.<br>62 | 65.<br>36 | 64.<br>98 | 65.<br>46 | 64.<br>66 | 67.<br>80 | 64.<br>89 | 68.<br>11 | 66.<br>89 | 65.<br>25 | 63.<br>11 | 62.<br>82 | 63.<br>56 | 64.<br>78 | 64.<br>94 | 67.<br>40 | 62.<br>68 | 65.<br>69 | 62.<br>39 | 62.<br>44 |
| <b>380</b>    | 65.<br>46 | 67.<br>06 | 66.<br>44 | 67.<br>14 | 66.<br>48 | 69.<br>47 | 66.<br>47 | 69.<br>70 | 68.<br>45 | 67.<br>02 | 64.<br>70 | 64.<br>72 | 65.<br>03 | 66.<br>32 | 66.<br>35 | 68.<br>78 | 64.<br>33 | 67.<br>03 | 63.<br>59 | 63.<br>87 |
| <b>390</b>    | 66.<br>73 | 68.<br>31 | 67.<br>52 | 68.<br>31 | 67.<br>77 | 70.<br>77 | 67.<br>62 | 70.<br>71 | 69.<br>51 | 68.<br>33 | 65.<br>78 | 66.<br>16 | 65.<br>99 | 67.<br>36 | 67.<br>32 | 69.<br>86 | 65.<br>56 | 67.<br>97 | 64.<br>51 | 64.<br>91 |
| <b>400</b>    | 67.<br>88 | 69.<br>58 | 68.<br>48 | 69.<br>44 | 68.<br>98 | 71.<br>88 | 68.<br>65 | 71.<br>66 | 70.<br>62 | 69.<br>46 | 66.<br>84 | 67.<br>43 | 66.<br>92 | 68.<br>22 | 68.<br>20 | 70.<br>69 | 66.<br>66 | 68.<br>91 | 65.<br>39 | 66.<br>02 |
| <b>410</b>    | 68.<br>44 | 70.<br>26 | 68.<br>96 | 69.<br>97 | 69.<br>75 | 72.<br>48 | 69.<br>21 | 72.<br>13 | 71.<br>18 | 70.<br>29 | 67.<br>43 | 68.<br>40 | 67.<br>45 | 68.<br>81 | 68.<br>67 | 71.<br>21 | 67.<br>48 | 69.<br>33 | 65.<br>87 | 66.<br>71 |

|     |           |           |           |           |           |           |           |           |           |           |           |           |           |           |           |           |           |           |           |           |
|-----|-----------|-----------|-----------|-----------|-----------|-----------|-----------|-----------|-----------|-----------|-----------|-----------|-----------|-----------|-----------|-----------|-----------|-----------|-----------|-----------|
| 420 | 68.<br>86 | 70.<br>75 | 69.<br>34 | 70.<br>43 | 70.<br>34 | 73.<br>03 | 69.<br>60 | 72.<br>60 | 71.<br>59 | 70.<br>85 | 67.<br>88 | 68.<br>98 | 67.<br>93 | 69.<br>14 | 69.<br>11 | 71.<br>53 | 67.<br>92 | 69.<br>69 | 66.<br>18 | 67.<br>21 |
| 430 | 69.<br>52 | 71.<br>38 | 69.<br>93 | 71.<br>13 | 70.<br>97 | 73.<br>60 | 70.<br>16 | 73.<br>21 | 72.<br>27 | 71.<br>47 | 68.<br>43 | 69.<br>80 | 68.<br>38 | 69.<br>60 | 69.<br>45 | 72.<br>06 | 68.<br>58 | 70.<br>14 | 66.<br>62 | 67.<br>70 |
| 440 | 69.<br>37 | 71.<br>33 | 69.<br>81 | 70.<br>98 | 71.<br>08 | 73.<br>56 | 70.<br>17 | 73.<br>14 | 72.<br>16 | 71.<br>54 | 68.<br>45 | 69.<br>97 | 68.<br>27 | 69.<br>52 | 69.<br>37 | 71.<br>96 | 68.<br>47 | 70.<br>04 | 66.<br>49 | 67.<br>63 |
| 450 | 69.<br>76 | 71.<br>77 | 70.<br>21 | 71.<br>45 | 71.<br>47 | 74.<br>01 | 70.<br>55 | 73.<br>48 | 72.<br>53 | 71.<br>93 | 68.<br>74 | 70.<br>40 | 68.<br>63 | 69.<br>84 | 69.<br>70 | 72.<br>30 | 68.<br>93 | 70.<br>18 | 66.<br>76 | 68.<br>03 |
| 460 | 70.<br>00 | 72.<br>05 | 70.<br>45 | 71.<br>82 | 71.<br>77 | 74.<br>25 | 70.<br>79 | 73.<br>71 | 72.<br>78 | 72.<br>31 | 69.<br>00 | 70.<br>65 | 68.<br>84 | 70.<br>12 | 69.<br>87 | 72.<br>46 | 69.<br>16 | 70.<br>53 | 66.<br>92 | 68.<br>29 |
| 470 | 69.<br>94 | 72.<br>02 | 70.<br>37 | 71.<br>76 | 71.<br>90 | 74.<br>25 | 70.<br>84 | 73.<br>67 | 72.<br>77 | 72.<br>28 | 68.<br>97 | 70.<br>73 | 68.<br>81 | 70.<br>03 | 69.<br>83 | 72.<br>40 | 69.<br>14 | 70.<br>44 | 66.<br>83 | 68.<br>24 |
| 480 | 70.<br>12 | 72.<br>21 | 70.<br>57 | 71.<br>98 | 71.<br>98 | 74.<br>48 | 70.<br>98 | 73.<br>74 | 72.<br>92 | 72.<br>47 | 69.<br>19 | 71.<br>00 | 68.<br>88 | 70.<br>12 | 69.<br>99 | 72.<br>53 | 69.<br>34 | 70.<br>53 | 66.<br>95 | 68.<br>34 |
| 490 | 70.<br>08 | 72.<br>20 | 70.<br>43 | 71.<br>95 | 72.<br>03 | 74.<br>46 | 70.<br>92 | 73.<br>74 | 72.<br>84 | 72.<br>47 | 69.<br>11 | 71.<br>01 | 68.<br>89 | 70.<br>06 | 69.<br>85 | 72.<br>47 | 69.<br>25 | 70.<br>50 | 66.<br>89 | 68.<br>33 |
| 500 | 70.<br>28 | 72.<br>35 | 70.<br>64 | 72.<br>10 | 72.<br>27 | 74.<br>68 | 71.<br>15 | 73.<br>94 | 73.<br>04 | 72.<br>64 | 69.<br>26 | 71.<br>21 | 68.<br>97 | 70.<br>22 | 70.<br>03 | 72.<br>59 | 69.<br>45 | 70.<br>62 | 66.<br>97 | 68.<br>46 |
| 510 | 70.<br>33 | 72.<br>43 | 70.<br>62 | 72.<br>18 | 72.<br>35 | 74.<br>64 | 71.<br>19 | 73.<br>89 | 73.<br>10 | 72.<br>70 | 69.<br>32 | 71.<br>27 | 69.<br>00 | 70.<br>23 | 69.<br>99 | 72.<br>63 | 69.<br>48 | 70.<br>59 | 66.<br>95 | 68.<br>50 |
| 520 | 70.<br>29 | 72.<br>42 | 70.<br>67 | 72.<br>15 | 72.<br>39 | 74.<br>63 | 71.<br>16 | 73.<br>90 | 73.<br>08 | 72.<br>73 | 69.<br>30 | 71.<br>37 | 68.<br>99 | 70.<br>12 | 69.<br>96 | 72.<br>61 | 69.<br>38 | 70.<br>58 | 66.<br>98 | 68.<br>46 |
| 530 | 70.<br>29 | 72.<br>39 | 70.<br>64 | 72.<br>14 | 72.<br>32 | 74.<br>65 | 71.<br>19 | 73.<br>85 | 73.<br>03 | 72.<br>71 | 69.<br>31 | 71.<br>39 | 68.<br>98 | 70.<br>10 | 69.<br>99 | 72.<br>59 | 69.<br>43 | 70.<br>52 | 66.<br>91 | 68.<br>44 |
| 540 | 70.<br>27 | 72.<br>38 | 70.<br>66 | 72.<br>21 | 72.<br>38 | 74.<br>69 | 71.<br>14 | 73.<br>89 | 73.<br>13 | 72.<br>72 | 69.<br>34 | 71.<br>38 | 69.<br>00 | 70.<br>16 | 70.<br>03 | 72.<br>59 | 69.<br>51 | 70.<br>53 | 66.<br>90 | 68.<br>49 |
| 550 | 70.<br>24 | 72.<br>32 | 70.<br>62 | 72.<br>14 | 72.<br>40 | 74.<br>68 | 71.<br>10 | 73.<br>87 | 73.<br>03 | 72.<br>72 | 69.<br>27 | 71.<br>34 | 68.<br>91 | 70.<br>10 | 69.<br>94 | 72.<br>55 | 69.<br>44 | 70.<br>49 | 66.<br>83 | 68.<br>40 |
| 560 | 70.<br>28 | 72.<br>37 | 70.<br>62 | 72.<br>17 | 72.<br>45 | 74.<br>71 | 71.<br>16 | 73.<br>87 | 73.<br>04 | 72.<br>74 | 69.<br>30 | 71.<br>38 | 68.<br>93 | 70.<br>12 | 69.<br>95 | 72.<br>57 | 69.<br>44 | 70.<br>53 | 66.<br>86 | 68.<br>43 |
| 570 | 70.<br>31 | 72.<br>40 | 70.<br>68 | 72.<br>23 | 72.<br>47 | 74.<br>77 | 71.<br>16 | 73.<br>85 | 73.<br>12 | 72.<br>74 | 69.<br>34 | 71.<br>47 | 68.<br>98 | 70.<br>12 | 69.<br>96 | 72.<br>57 | 69.<br>48 | 70.<br>52 | 66.<br>87 | 68.<br>46 |
| 580 | 70.<br>28 | 72.<br>39 | 70.<br>64 | 72.<br>21 | 72.<br>44 | 74.<br>74 | 71.<br>13 | 73.<br>84 | 73.<br>05 | 72.<br>71 | 69.<br>28 | 71.<br>46 | 68.<br>93 | 70.<br>05 | 69.<br>91 | 72.<br>49 | 69.<br>45 | 70.<br>46 | 66.<br>82 | 68.<br>41 |
| 590 | 70.<br>31 | 72.<br>44 | 70.<br>70 | 72.<br>25 | 72.<br>49 | 74.<br>72 | 71.<br>15 | 73.<br>85 | 73.<br>10 | 72.<br>73 | 69.<br>31 | 71.<br>43 | 68.<br>91 | 70.<br>11 | 69.<br>95 | 72.<br>57 | 69.<br>48 | 70.<br>47 | 66.<br>87 | 68.<br>41 |
| 600 | 70.<br>21 | 72.<br>28 | 70.<br>59 | 72.<br>08 | 72.<br>35 | 74.<br>65 | 71.<br>01 | 73.<br>73 | 73.<br>02 | 72.<br>60 | 69.<br>22 | 71.<br>42 | 68.<br>77 | 70.<br>00 | 69.<br>82 | 72.<br>42 | 69.<br>35 | 70.<br>33 | 66.<br>82 | 68.<br>35 |
| 610 | 70.<br>26 | 72.<br>35 | 70.<br>61 | 72.<br>11 | 72.<br>42 | 74.<br>67 | 71.<br>13 | 73.<br>81 | 73.<br>04 | 72.<br>64 | 69.<br>27 | 71.<br>43 | 68.<br>84 | 70.<br>05 | 69.<br>86 | 72.<br>45 | 69.<br>40 | 70.<br>44 | 66.<br>78 | 68.<br>39 |
| 620 | 70.<br>25 | 72.<br>30 | 70.<br>59 | 72.<br>14 | 72.<br>40 | 74.<br>59 | 71.<br>10 | 73.<br>76 | 72.<br>99 | 72.<br>67 | 69.<br>20 | 71.<br>40 | 68.<br>82 | 70.<br>01 | 69.<br>81 | 72.<br>38 | 69.<br>29 | 70.<br>35 | 66.<br>76 | 68.<br>32 |

|            |               |               |               |               |               |               |               |               |               |               |               |               |               |               |               |               |               |               |               |               |
|------------|---------------|---------------|---------------|---------------|---------------|---------------|---------------|---------------|---------------|---------------|---------------|---------------|---------------|---------------|---------------|---------------|---------------|---------------|---------------|---------------|
| <b>630</b> | 70.<br>30     | 72.<br>44     | 70.<br>69     | 72.<br>21     | 72.<br>51     | 74.<br>79     | 71.<br>10     | 73.<br>92     | 73.<br>08     | 72.<br>76     | 69.<br>35     | 71.<br>57     | 68.<br>93     | 70.<br>12     | 69.<br>90     | 72.<br>52     | 69.<br>41     | 70.<br>45     | 66.<br>80     | 68.<br>41     |
| <b>640</b> | 70.<br>25     | 72.<br>35     | 70.<br>67     | 72.<br>19     | 72.<br>48     | 74.<br>66     | 71.<br>15     | 73.<br>83     | 73.<br>04     | 72.<br>68     | 69.<br>19     | 71.<br>46     | 68.<br>78     | 70.<br>00     | 69.<br>80     | 72.<br>38     | 69.<br>31     | 70.<br>42     | 66.<br>77     | 68.<br>32     |
| <b>650</b> | 70.<br>32     | 72.<br>41     | 70.<br>63     | 72.<br>15     | 72.<br>48     | 74.<br>73     | 71.<br>13     | 73.<br>83     | 73.<br>01     | 72.<br>73     | 69.<br>29     | 71.<br>47     | 68.<br>85     | 70.<br>06     | 69.<br>82     | 72.<br>45     | 69.<br>38     | 70.<br>37     | 66.<br>72     | 68.<br>37     |
| <b>660</b> | 70.<br>13     | 72.<br>17     | 70.<br>52     | 72.<br>10     | 72.<br>33     | 74.<br>60     | 71.<br>02     | 73.<br>76     | 72.<br>89     | 72.<br>65     | 69.<br>08     | 71.<br>38     | 68.<br>64     | 69.<br>90     | 69.<br>64     | 72.<br>29     | 69.<br>15     | 70.<br>25     | 66.<br>65     | 68.<br>17     |
| <b>670</b> | 70.<br>18     | 72.<br>30     | 70.<br>56     | 72.<br>13     | 72.<br>41     | 74.<br>57     | 71.<br>07     | 73.<br>80     | 72.<br>93     | 72.<br>67     | 69.<br>18     | 71.<br>44     | 68.<br>72     | 69.<br>99     | 69.<br>70     | 72.<br>32     | 69.<br>26     | 70.<br>29     | 66.<br>59     | 68.<br>24     |
| <b>680</b> | 70.<br>11     | 72.<br>19     | 70.<br>43     | 72.<br>02     | 72.<br>36     | 74.<br>52     | 70.<br>95     | 73.<br>75     | 72.<br>89     | 72.<br>66     | 69.<br>07     | 71.<br>36     | 68.<br>68     | 69.<br>89     | 69.<br>64     | 72.<br>25     | 69.<br>21     | 70.<br>19     | 66.<br>59     | 68.<br>19     |
| <b>690</b> | 70.<br>27     | 72.<br>29     | 70.<br>62     | 72.<br>12     | 72.<br>44     | 74.<br>66     | 71.<br>17     | 73.<br>81     | 72.<br>99     | 72.<br>76     | 69.<br>21     | 71.<br>43     | 68.<br>75     | 70.<br>00     | 69.<br>68     | 72.<br>33     | 69.<br>31     | 70.<br>27     | 66.<br>58     | 68.<br>29     |
| <b>700</b> | 70.<br>20     | 72.<br>30     | 70.<br>53     | 72.<br>08     | 72.<br>38     | 74.<br>59     | 71.<br>05     | 73.<br>83     | 72.<br>94     | 72.<br>75     | 69.<br>16     | 71.<br>42     | 68.<br>68     | 69.<br>93     | 69.<br>67     | 72.<br>28     | 69.<br>22     | 70.<br>21     | 66.<br>55     | 68.<br>18     |
| <b>710</b> | 70.<br>18     | 72.<br>20     | 70.<br>49     | 72.<br>00     | 72.<br>36     | 74.<br>54     | 71.<br>01     | 73.<br>80     | 72.<br>91     | 72.<br>73     | 69.<br>09     | 71.<br>38     | 68.<br>64     | 69.<br>97     | 69.<br>62     | 72.<br>22     | 69.<br>19     | 70.<br>21     | 66.<br>52     | 68.<br>13     |
| <b>720</b> | 70.<br>11     | 72.<br>19     | 70.<br>46     | 72.<br>03     | 72.<br>31     | 74.<br>49     | 71.<br>00     | 73.<br>76     | 72.<br>83     | 72.<br>72     | 69.<br>10     | 71.<br>33     | 68.<br>58     | 69.<br>89     | 69.<br>55     | 72.<br>13     | 69.<br>15     | 70.<br>14     | 66.<br>51     | 68.<br>13     |
| <b>730</b> | 70.<br>12     | 72.<br>13     | 70.<br>42     | 71.<br>99     | 72.<br>30     | 74.<br>47     | 70.<br>90     | 73.<br>70     | 72.<br>79     | 72.<br>70     | 69.<br>05     | 71.<br>25     | 68.<br>57     | 69.<br>84     | 69.<br>50     | 72.<br>09     | 69.<br>06     | 70.<br>08     | 66.<br>44     | 68.<br>09     |
| <b>740</b> | 70.<br>08     | 72.<br>09     | 70.<br>45     | 71.<br>98     | 72.<br>29     | 74.<br>49     | 70.<br>88     | 73.<br>72     | 72.<br>78     | 72.<br>67     | 69.<br>08     | 71.<br>25     | 68.<br>54     | 69.<br>87     | 69.<br>44     | 72.<br>06     | 69.<br>06     | 70.<br>08     | 66.<br>40     | 68.<br>05     |
|            |               |               |               |               |               |               |               |               | <b>D65_64</b> |               |               |               |               |               |               |               |               |               |               |               |
|            |               |               |               |               |               |               |               |               | <b>CIE</b>    |               |               |               |               |               |               |               |               |               |               |               |
| <b>X</b>   | 66.<br>50     | 68.<br>46     | 66.<br>86     | 68.<br>26     | 68.<br>46     | 70.<br>65     | 67.<br>29     | 69.<br>90     | 69.<br>14     | 68.<br>75     | 65.<br>56     | 67.<br>49     | 65.<br>24     | 66.<br>37     | 66.<br>21     | 68.<br>67     | 65.<br>68     | 66.<br>74     | 63.<br>32     | 64.<br>75     |
| <b>Y</b>   | 70.<br>24     | 72.<br>34     | 70.<br>61     | 72.<br>12     | 72.<br>34     | 74.<br>64     | 71.<br>10     | 73.<br>83     | 73.<br>03     | 72.<br>66     | 69.<br>26     | 71.<br>32     | 68.<br>91     | 70.<br>10     | 69.<br>93     | 72.<br>53     | 69.<br>40     | 70.<br>49     | 66.<br>87     | 68.<br>40     |
| <b>Z</b>   | 74.<br>77     | 76.<br>91     | 75.<br>24     | 76.<br>61     | 76.<br>61     | 79.<br>31     | 75.<br>62     | 78.<br>75     | 77.<br>75     | 77.<br>12     | 73.<br>70     | 75.<br>40     | 73.<br>55     | 74.<br>88     | 74.<br>71     | 77.<br>47     | 73.<br>84     | 75.<br>36     | 71.<br>56     | 72.<br>90     |
| <b>L*</b>  | 87.<br>12     | 88.<br>13     | 87.<br>30     | 88.<br>03     | 88.<br>13     | 89.<br>22     | 87.<br>53     | 88.<br>84     | 88.<br>46     | 88.<br>28     | 86.<br>63     | 87.<br>64     | 86.<br>46     | 87.<br>04     | 86.<br>96     | 88.<br>22     | 86.<br>70     | 87.<br>24     | 85.<br>44     | 86.<br>21     |
| <b>a*</b>  | -<br>0.2<br>2 | -<br>0.2<br>6 | -<br>0.1<br>9 | -<br>0.2<br>6 | -<br>0.2<br>7 | -<br>0.2<br>4 | -<br>0.2<br>6 | -<br>0.2<br>1 | -<br>0.2<br>2 | -<br>0.2<br>9 | -<br>0.2<br>4 | -<br>0.2<br>9 | -<br>0.2<br>3 | -<br>0.2<br>0 | -<br>0.2<br>1 | -<br>0.2<br>1 | -<br>0.2<br>6 | -<br>0.2<br>1 | -<br>0.1<br>7 | -<br>0.2<br>4 |
| <b>b*</b>  | 0.4<br>8      | 0.5<br>5      | 0.4<br>2      | 0.6<br>1      | 0.7<br>8      | 0.5<br>9      | 0.5<br>3      | 0.3<br>6      | 0.4<br>7      | 0.6<br>5      | 0.4<br>9      | 0.8<br>8      | 0.3<br>1      | 0.2<br>6      | 0.2<br>6      | 0.2<br>8      | 0.5<br>0      | 0.2<br>2      | 0.1<br>6      | 0.4<br>0      |

[Figure S2: RED, CYAN, BLUE, YELLOW samples]

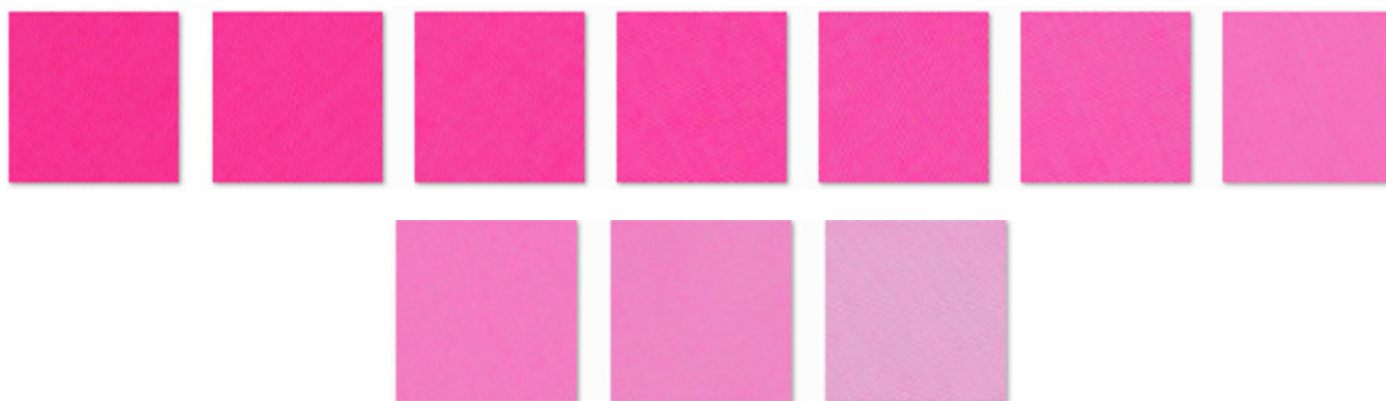

[RED :1-10 (Bottom to top & right to Left)]

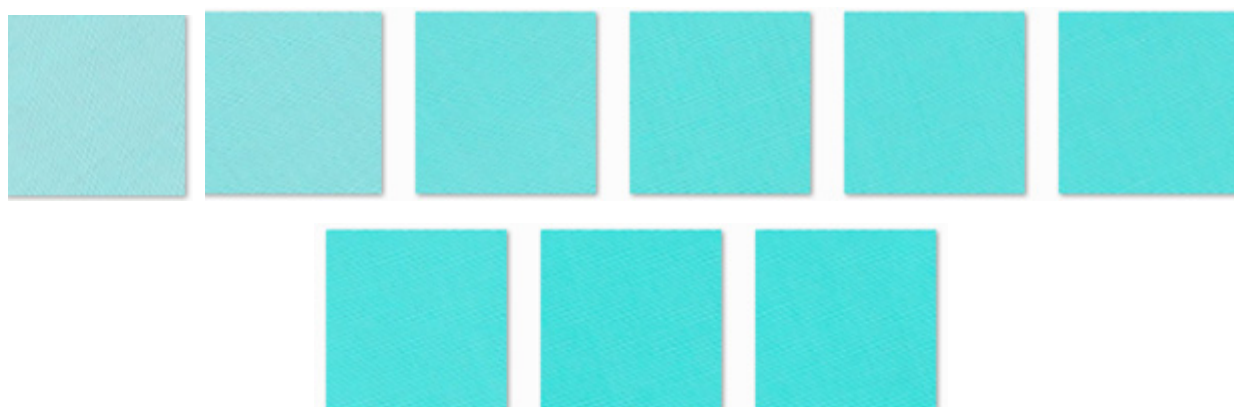

[CYAN :1-10 (Top to bottom & Left to right)]

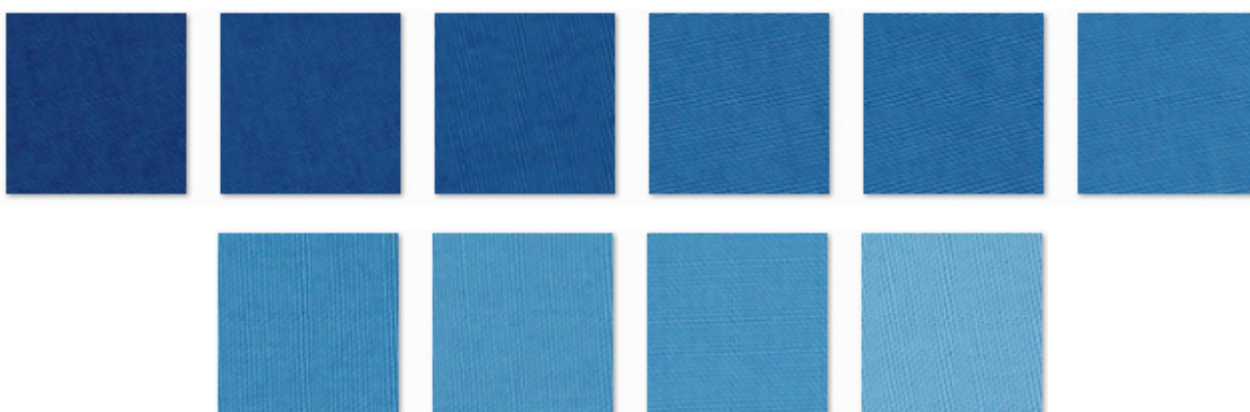

[BLUE :1-10 (Bottom to top & right to Left)]



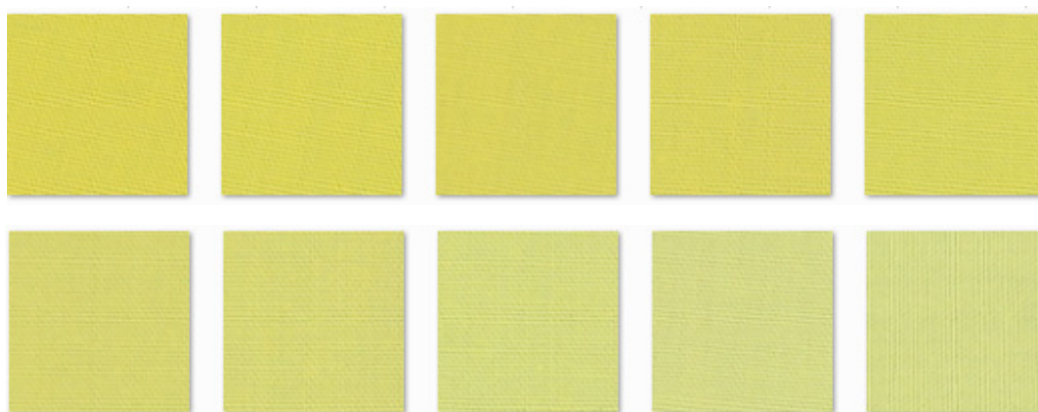

[YELLOW :1-10 (Bottom to top &amp; right to Left)]

[Table S3. Calibrated RGB Readings of RED, CYAN, BLUE &amp; YELLOW fabric samples ]

|           |        | RED    |        |        |      |      |      |      |      |      |      |
|-----------|--------|--------|--------|--------|------|------|------|------|------|------|------|
|           | R      | G      | B      | I      | r    | g    | b    | rg   | gb   | rb   | rgb  |
| sample 1  | 246.24 | 51.91  | 146.10 | 148.08 | 0.97 | 0.20 | 0.57 | 0.20 | 0.12 | 0.55 | 0.11 |
| sample 2  | 247.56 | 57.45  | 151.86 | 152.29 | 0.97 | 0.23 | 0.60 | 0.22 | 0.13 | 0.58 | 0.13 |
| sample 3  | 247.77 | 65.37  | 158.23 | 157.12 | 0.97 | 0.26 | 0.62 | 0.25 | 0.16 | 0.60 | 0.15 |
| sample 4  | 248.09 | 70.84  | 163.78 | 160.90 | 0.97 | 0.28 | 0.64 | 0.27 | 0.18 | 0.62 | 0.17 |
| sample 5  | 246.83 | 79.70  | 170.15 | 165.56 | 0.97 | 0.31 | 0.67 | 0.30 | 0.21 | 0.65 | 0.20 |
| sample 6  | 246.54 | 92.58  | 177.06 | 172.06 | 0.97 | 0.36 | 0.69 | 0.35 | 0.25 | 0.67 | 0.24 |
| sample 7  | 245.11 | 113.26 | 188.38 | 182.25 | 0.96 | 0.44 | 0.74 | 0.43 | 0.33 | 0.71 | 0.32 |
| sample 8  | 243.36 | 123.64 | 193.41 | 186.80 | 0.95 | 0.48 | 0.76 | 0.46 | 0.37 | 0.72 | 0.35 |
| sample 9  | 238.90 | 135.36 | 196.98 | 190.42 | 0.94 | 0.53 | 0.77 | 0.50 | 0.41 | 0.72 | 0.38 |
| sample 10 | 229.98 | 166.59 | 208.38 | 201.65 | 0.90 | 0.65 | 0.82 | 0.59 | 0.53 | 0.74 | 0.48 |
|           |        | CYAN   |        |        |      |      |      |      |      |      |      |
| sample 1  | 162.33 | 223.37 | 224.57 | 203.43 | 0.64 | 0.88 | 0.88 | 0.56 | 0.77 | 0.56 | 0.49 |
| sample 2  | 140.97 | 223.22 | 223.88 | 196.02 | 0.55 | 0.88 | 0.88 | 0.48 | 0.77 | 0.49 | 0.42 |
| sample 3  | 112.72 | 223.46 | 222.53 | 186.24 | 0.44 | 0.88 | 0.87 | 0.39 | 0.76 | 0.39 | 0.34 |
| sample 4  | 97.15  | 223.52 | 220.77 | 180.48 | 0.38 | 0.88 | 0.87 | 0.33 | 0.76 | 0.33 | 0.29 |
| sample 5  | 95.19  | 223.01 | 221.04 | 179.75 | 0.37 | 0.87 | 0.87 | 0.33 | 0.76 | 0.32 | 0.28 |
| sample 6  | 90.33  | 222.38 | 220.23 | 177.65 | 0.35 | 0.87 | 0.86 | 0.31 | 0.75 | 0.31 | 0.27 |
| sample 7  | 82.63  | 224.69 | 222.00 | 176.44 | 0.32 | 0.88 | 0.87 | 0.29 | 0.77 | 0.28 | 0.25 |
| sample 8  | 71.04  | 222.88 | 219.78 | 171.23 | 0.28 | 0.87 | 0.86 | 0.24 | 0.75 | 0.24 | 0.21 |
| sample 9  | 72.06  | 223.18 | 220.30 | 171.85 | 0.28 | 0.88 | 0.86 | 0.25 | 0.76 | 0.24 | 0.21 |
|           |        | BLUE   |        |        |      |      |      |      |      |      |      |
| sample 1  | 24.57  | 61.04  | 116.78 | 67.47  | 0.10 | 0.24 | 0.46 | 0.02 | 0.11 | 0.04 | 0.01 |
| sample 2  | 27.66  | 72.02  | 129.65 | 76.44  | 0.11 | 0.28 | 0.51 | 0.03 | 0.14 | 0.06 | 0.02 |
| sample 3  | 29.43  | 82.54  | 139.51 | 83.83  | 0.12 | 0.32 | 0.55 | 0.04 | 0.18 | 0.06 | 0.02 |
| sample 4  | 39.59  | 105.62 | 160.23 | 101.81 | 0.16 | 0.41 | 0.63 | 0.06 | 0.26 | 0.10 | 0.04 |

|           |        |               |        |        |      |      |      |      |      |      |      |
|-----------|--------|---------------|--------|--------|------|------|------|------|------|------|------|
| sample 5  | 40.92  | 105.71        | 160.09 | 102.24 | 0.16 | 0.41 | 0.63 | 0.07 | 0.26 | 0.10 | 0.04 |
| sample 6  | 48.67  | 118.85        | 170.96 | 112.83 | 0.19 | 0.47 | 0.67 | 0.09 | 0.31 | 0.13 | 0.06 |
| sample 7  | 62.30  | 136.44        | 182.98 | 127.24 | 0.24 | 0.54 | 0.72 | 0.13 | 0.38 | 0.18 | 0.09 |
| sample 8  | 72.81  | 146.09        | 190.21 | 136.37 | 0.29 | 0.57 | 0.75 | 0.16 | 0.43 | 0.21 | 0.12 |
| sample 9  | 75.84  | 148.44        | 190.45 | 138.25 | 0.30 | 0.58 | 0.75 | 0.17 | 0.43 | 0.22 | 0.13 |
| sample 10 | 107.26 | 169.83        | 204.37 | 160.49 | 0.42 | 0.67 | 0.80 | 0.28 | 0.53 | 0.34 | 0.22 |
|           |        | <b>YELLOW</b> |        |        |      |      |      |      |      |      |      |
| sample 1  | 219.80 | 210.86        | 86.25  | 172.30 | 0.86 | 0.83 | 0.34 | 0.71 | 0.28 | 0.29 | 0.24 |
| sample 2  | 218.88 | 212.84        | 90.51  | 174.08 | 0.86 | 0.83 | 0.35 | 0.72 | 0.30 | 0.30 | 0.25 |
| sample 3  | 218.04 | 210.36        | 94.92  | 174.44 | 0.86 | 0.82 | 0.37 | 0.71 | 0.31 | 0.32 | 0.26 |
| sample 4  | 217.70 | 210.89        | 97.54  | 175.38 | 0.85 | 0.83 | 0.38 | 0.71 | 0.32 | 0.33 | 0.27 |
| sample 5  | 216.26 | 213.16        | 98.63  | 176.01 | 0.85 | 0.84 | 0.39 | 0.71 | 0.32 | 0.33 | 0.27 |
| sample 6  | 215.42 | 212.80        | 114.42 | 180.88 | 0.84 | 0.83 | 0.45 | 0.71 | 0.37 | 0.38 | 0.32 |
| sample 7  | 215.54 | 214.88        | 119.58 | 183.34 | 0.85 | 0.84 | 0.47 | 0.71 | 0.40 | 0.40 | 0.33 |
| sample 8  | 214.21 | 218.30        | 129.13 | 187.21 | 0.84 | 0.86 | 0.51 | 0.72 | 0.43 | 0.43 | 0.36 |
| sample 9  | 213.88 | 217.27        | 136.91 | 189.35 | 0.84 | 0.85 | 0.54 | 0.71 | 0.46 | 0.45 | 0.38 |
| sample 10 | 213.24 | 217.98        | 137.95 | 189.72 | 0.84 | 0.85 | 0.54 | 0.71 | 0.46 | 0.45 | 0.39 |

[ Table S4. %R Reflectance readings of RED, CYAN, BLUE, YELLOW Samples ]

|            |       |       |       | Wavelength ~%R |       |       |       |       |       |       |
|------------|-------|-------|-------|----------------|-------|-------|-------|-------|-------|-------|
| RED Shade% | 0.25% | 0.50% | 0.75% | 1%             | 1.50% | 2%    | 3%    | 4%    | 5%    | 6%    |
| 360        | 16.75 | 15.37 | 17.92 | 18.22          | 20.04 | 21.37 | 23.27 | 24.7  | 25.97 | 30.6  |
| 370        | 17.76 | 16.38 | 18.9  | 19.22          | 20.99 | 22.28 | 24.03 | 25.4  | 26.6  | 31.01 |
| 380        | 19.03 | 17.62 | 20.25 | 20.61          | 22.53 | 23.92 | 25.86 | 27.28 | 28.62 | 33.22 |
| 390        | 21.27 | 19.73 | 22.65 | 23.14          | 25.25 | 26.92 | 29.29 | 30.98 | 32.45 | 37.7  |
| 400        | 24.48 | 22.72 | 26.19 | 26.91          | 29.42 | 31.62 | 35.05 | 37.2  | 39.41 | 46.19 |
| 410        | 28.59 | 26.47 | 30.85 | 31.9           | 35.11 | 38.05 | 43.54 | 46.71 | 50.01 | 59.58 |
| 420        | 30.78 | 28.59 | 33.28 | 34.48          | 37.86 | 41.14 | 47.38 | 50.5  | 54.45 | 64.36 |
| 430        | 31.86 | 29.53 | 34.38 | 35.65          | 39.12 | 42.38 | 48.81 | 52.2  | 56.1  | 66.13 |
| 440        | 31.93 | 29.61 | 34.46 | 35.68          | 39.12 | 42.31 | 48.63 | 51.87 | 55.62 | 65.31 |
| 450        | 30.39 | 28.15 | 32.87 | 33.96          | 37.29 | 40.42 | 46.36 | 49.54 | 53.14 | 62.56 |
| 460        | 26.85 | 24.72 | 29.29 | 30.24          | 33.48 | 36.53 | 42.29 | 45.44 | 49.06 | 58.92 |
| 470        | 22.37 | 20.42 | 24.72 | 25.51          | 28.54 | 31.64 | 37.14 | 40.32 | 44.09 | 54.71 |
| 480        | 17.9  | 16.19 | 20.12 | 20.73          | 23.54 | 26.49 | 31.63 | 34.77 | 38.51 | 49.74 |
| 490        | 14.8  | 13.27 | 16.86 | 17.35          | 19.99 | 22.79 | 27.52 | 30.65 | 34.27 | 45.83 |
| 500        | 12.43 | 11.06 | 14.31 | 14.72          | 17.16 | 19.85 | 24.25 | 27.35 | 30.86 | 42.68 |
| 510        | 10.26 | 9.07  | 11.95 | 12.3           | 14.5  | 17.01 | 21.09 | 23.96 | 27.39 | 39.16 |
| 520        | 8.79  | 7.75  | 10.34 | 10.63          | 12.65 | 14.97 | 18.8  | 21.57 | 24.86 | 36.44 |



|      |       |       |       |       |       |       |       |       |       |       |
|------|-------|-------|-------|-------|-------|-------|-------|-------|-------|-------|
| 530  | 8.34  | 7.34  | 9.83  | 10.09 | 12.05 | 14.23 | 18.05 | 20.78 | 24.01 | 35.52 |
| 540  | 8.37  | 7.36  | 9.85  | 10.11 | 12.08 | 14.32 | 18.06 | 20.78 | 24.03 | 35.49 |
| 550  | 8.11  | 7.14  | 9.56  | 9.82  | 11.72 | 13.95 | 17.56 | 20.32 | 23.51 | 34.86 |
| 560  | 8.06  | 7.08  | 9.46  | 9.73  | 11.64 | 13.81 | 17.48 | 20.16 | 23.43 | 34.73 |
| 570  | 9.51  | 8.39  | 11.15 | 11.41 | 13.54 | 15.89 | 19.91 | 22.74 | 26.12 | 37.62 |
| 580  | 14.15 | 12.69 | 16.29 | 16.66 | 19.26 | 21.9  | 26.61 | 29.79 | 33.2  | 44.42 |
| 590  | 23.2  | 21.2  | 25.78 | 26.29 | 29.34 | 32.13 | 37.41 | 40.6  | 43.65 | 52.96 |
| 600  | 35.18 | 32.8  | 37.77 | 38.49 | 41.54 | 44.01 | 48.83 | 51.38 | 53.36 | 59.37 |
| 610  | 47.27 | 44.95 | 49.15 | 50.22 | 52.46 | 54.2  | 57.47 | 59.09 | 59.91 | 62.82 |
| 620  | 56.68 | 54.88 | 57.29 | 58.7  | 59.99 | 60.88 | 62.54 | 63.33 | 63.3  | 64.41 |
| 630  | 61.93 | 60.61 | 61.62 | 63.13 | 63.7  | 64.1  | 64.79 | 65.22 | 64.79 | 65.07 |
| 640  | 64.23 | 63.28 | 63.38 | 64.89 | 65.18 | 65.24 | 65.55 | 65.73 | 65.2  | 65.18 |
| 650  | 65.1  | 64.35 | 63.98 | 65.54 | 65.6  | 65.65 | 65.64 | 65.87 | 65.26 | 65.14 |
| 660  | 65.31 | 64.63 | 64.19 | 65.62 | 65.68 | 65.64 | 65.54 | 65.72 | 65.09 | 64.92 |
| 670  | 65.52 | 64.83 | 64.23 | 65.73 | 65.67 | 65.59 | 65.52 | 65.7  | 65.05 | 64.95 |
| 680  | 65.34 | 64.7  | 64.09 | 65.54 | 65.47 | 65.41 | 65.18 | 65.42 | 64.81 | 64.74 |
| 690  | 65.43 | 64.78 | 64.12 | 65.53 | 65.51 | 65.37 | 65.29 | 65.43 | 64.93 | 64.84 |
| 700  | 65.33 | 64.75 | 64.01 | 65.47 | 65.41 | 65.35 | 65.11 | 65.32 | 64.81 | 64.76 |
| 710  | 65.37 | 64.74 | 64.08 | 65.45 | 65.36 | 65.23 | 65.06 | 65.3  | 64.76 | 64.71 |
| 720  | 65.22 | 64.58 | 63.88 | 65.25 | 65.23 | 65.09 | 64.89 | 65.15 | 64.67 | 64.64 |
| 730  | 65.11 | 64.44 | 63.83 | 65.17 | 65.08 | 65.03 | 64.77 | 65.03 | 64.51 | 64.57 |
| 740  | 64.99 | 64.39 | 63.84 | 65.11 | 65.01 | 64.98 | 64.66 | 64.95 | 64.46 | 64.49 |
| CYAN | 0.25% | 0.50% | 0.75% | 1%    | 1.50% | 2%    | 3%    | 4%    | 5%    |       |
| 360  | 29.05 | 26.01 | 21.85 | 19.86 | 19.72 | 18.96 | 18.54 | 16.23 | 16.03 |       |
| 370  | 30.99 | 28.96 | 25.54 | 23.78 | 23.95 | 23.24 | 22.93 | 20.63 | 20.5  |       |
| 380  | 34.51 | 32.94 | 30.1  | 28.5  | 28.81 | 28.22 | 27.97 | 25.67 | 25.61 |       |
| 390  | 40.04 | 38.43 | 35.66 | 33.98 | 34.36 | 33.77 | 33.59 | 31.14 | 31.06 |       |
| 400  | 50.21 | 47.61 | 43.82 | 41.73 | 42.07 | 41.27 | 40.99 | 38.01 | 37.98 |       |
| 410  | 66.27 | 60.93 | 54.9  | 52.28 | 52.1  | 51.02 | 50.33 | 47    | 46.39 |       |
| 420  | 71.95 | 65.62 | 59.23 | 56.65 | 56.13 | 54.9  | 54.22 | 50.88 | 49.86 |       |
| 430  | 73.83 | 67.19 | 60.77 | 58.19 | 57.61 | 56.36 | 55.64 | 52.25 | 51.27 |       |
| 440  | 72.8  | 66.61 | 60.48 | 58.03 | 57.51 | 56.36 | 55.6  | 52.41 | 51.4  |       |
| 450  | 70.3  | 64.8  | 59.42 | 57.17 | 56.71 | 55.59 | 55.02 | 51.94 | 51.05 |       |
| 460  | 68.39 | 63.42 | 58.52 | 56.4  | 56    | 55.02 | 54.39 | 51.46 | 50.62 |       |
| 470  | 67.17 | 62.84 | 58.47 | 56.52 | 56.16 | 55.23 | 54.69 | 51.93 | 51.09 |       |
| 480  | 66.28 | 62.69 | 58.96 | 57.38 | 57.17 | 56.39 | 56.05 | 53.49 | 52.68 |       |
| 490  | 65.59 | 62.68 | 59.56 | 58.29 | 58.08 | 57.4  | 57.15 | 54.9  | 54.11 |       |
| 500  | 65.42 | 62.76 | 59.89 | 58.84 | 58.62 | 58.05 | 57.85 | 55.58 | 54.86 |       |
| 510  | 64.8  | 62.21 | 59.46 | 58.43 | 58.15 | 57.65 | 57.44 | 55.15 | 54.5  |       |
| 520  | 63.95 | 61.42 | 58.48 | 57.32 | 57.12 | 56.45 | 56.06 | 53.79 | 53.12 |       |
| 530  | 63.08 | 60.26 | 56.94 | 55.49 | 55.24 | 54.5  | 53.92 | 51.44 | 50.78 |       |

|      |       |       |       |       |       |       |       |       |       |       |
|------|-------|-------|-------|-------|-------|-------|-------|-------|-------|-------|
| 540  | 61.98 | 58.4  | 54.44 | 52.65 | 52.22 | 51.38 | 50.55 | 47.73 | 47.2  |       |
| 550  | 60.2  | 55.6  | 50.68 | 48.39 | 47.82 | 46.77 | 45.69 | 42.6  | 42.19 |       |
| 560  | 57.9  | 52.12 | 46.14 | 43.31 | 42.75 | 41.5  | 40.25 | 36.98 | 36.55 |       |
| 570  | 55.4  | 48.61 | 41.77 | 38.62 | 38.14 | 36.79 | 35.41 | 32.04 | 31.69 |       |
| 580  | 52.5  | 44.9  | 37.46 | 34.21 | 33.64 | 32.31 | 30.9  | 27.59 | 27.3  |       |
| 590  | 48.15 | 39.69 | 31.98 | 28.77 | 28.05 | 26.75 | 25.42 | 22.32 | 22.06 |       |
| 600  | 44.01 | 35.09 | 27.27 | 24.08 | 23.38 | 22.11 | 20.97 | 17.96 | 17.73 |       |
| 610  | 42.28 | 33.33 | 25.29 | 21.93 | 21.52 | 20.29 | 19.06 | 16.14 | 15.98 |       |
| 620  | 41.49 | 32.39 | 24.37 | 20.84 | 20.61 | 19.35 | 18.15 | 15.27 | 15.19 |       |
| 630  | 40.78 | 31.64 | 23.66 | 20.24 | 19.94 | 18.65 | 17.59 | 14.72 | 14.6  |       |
| 640  | 39.66 | 30.31 | 22.6  | 19.36 | 18.8  | 17.68 | 16.69 | 13.94 | 13.72 |       |
| 650  | 35.73 | 26.49 | 19.36 | 16.45 | 15.69 | 14.75 | 13.91 | 11.54 | 11.32 |       |
| 660  | 30.56 | 21.65 | 15.39 | 12.85 | 11.95 | 11.22 | 10.57 | 8.66  | 8.41  |       |
| 670  | 29.67 | 20.66 | 14.56 | 12.13 | 11.32 | 10.58 | 10.17 | 8.29  | 8.01  |       |
| 680  | 34.55 | 25.13 | 18.22 | 15.5  | 14.77 | 13.89 | 13.33 | 11.2  | 10.78 |       |
| 690  | 44.15 | 34.65 | 26.62 | 23.44 | 22.99 | 21.86 | 21.22 | 18.44 | 17.69 |       |
| 700  | 51.98 | 43.71 | 35.74 | 32.32 | 32.19 | 30.94 | 30.13 | 26.83 | 26.04 |       |
| 710  | 56.25 | 49.42 | 42.46 | 39.24 | 39.13 | 37.94 | 36.99 | 33.68 | 32.85 |       |
| 720  | 58.74 | 53.13 | 47.31 | 44.47 | 44.28 | 43.21 | 42.31 | 39.07 | 38.29 |       |
| 730  | 60.15 | 55.48 | 50.62 | 48.15 | 47.88 | 46.95 | 46.11 | 43.07 | 42.33 |       |
| 740  | 61.14 | 57.2  | 53.03 | 51.04 | 50.65 | 49.84 | 49.13 | 46.34 | 45.55 |       |
| BLUE | 0.25% | 0.50% | 0.75% | 1%    | 1.50% | 2%    | 3%    | 4%    | 5%    | 6%    |
| 360  | 5.48  | 6.58  | 7.53  | 10.88 | 11.67 | 13.01 | 15.43 | 18.58 | 17.21 | 24.62 |
| 370  | 7.24  | 8.56  | 9.73  | 13.45 | 14.53 | 15.98 | 18.34 | 21.67 | 20.29 | 27.48 |
| 380  | 9.68  | 11.27 | 12.67 | 16.79 | 18.15 | 19.72 | 22.14 | 25.66 | 24.29 | 31.48 |
| 390  | 12.73 | 14.62 | 16.25 | 20.82 | 22.33 | 24.03 | 26.65 | 30.39 | 29.01 | 36.41 |
| 400  | 16.11 | 18.32 | 20.25 | 25.49 | 26.94 | 28.95 | 32.13 | 35.99 | 34.46 | 42.62 |
| 410  | 19.26 | 21.95 | 24.16 | 30.48 | 31.54 | 34.05 | 38.3  | 42.36 | 40.63 | 50.11 |
| 420  | 20.86 | 23.79 | 26.14 | 32.98 | 33.75 | 36.34 | 41.06 | 45.06 | 43.39 | 52.96 |
| 430  | 21.06 | 24.03 | 26.37 | 33.39 | 34.13 | 36.72 | 41.58 | 45.62 | 43.91 | 53.55 |
| 440  | 20.18 | 23.07 | 25.41 | 32.32 | 33.08 | 35.64 | 40.37 | 44.45 | 42.81 | 52.59 |
| 450  | 18.9  | 21.69 | 23.93 | 30.76 | 31.61 | 34.05 | 38.79 | 42.78 | 41.09 | 50.78 |
| 460  | 17.17 | 19.86 | 22.01 | 28.66 | 29.48 | 31.91 | 36.55 | 40.62 | 38.91 | 48.7  |
| 470  | 15.27 | 17.76 | 19.84 | 26.28 | 27.08 | 29.47 | 33.98 | 38.1  | 36.29 | 46.37 |
| 480  | 13.31 | 15.64 | 17.57 | 23.75 | 24.53 | 26.79 | 31.23 | 35.25 | 33.48 | 43.7  |
| 490  | 11.63 | 13.79 | 15.59 | 21.49 | 22.24 | 24.45 | 28.75 | 32.76 | 30.96 | 41.25 |
| 500  | 10.07 | 12.05 | 13.7  | 19.29 | 20.01 | 22.08 | 26.36 | 30.32 | 28.47 | 38.9  |
| 510  | 8.71  | 10.5  | 12.01 | 17.28 | 17.96 | 19.97 | 24.06 | 27.97 | 26.13 | 36.58 |
| 520  | 7.56  | 9.18  | 10.55 | 15.47 | 16.13 | 18.09 | 21.94 | 25.85 | 24.02 | 34.44 |
| 530  | 6.53  | 7.98  | 9.21  | 13.77 | 14.41 | 16.17 | 19.87 | 23.74 | 21.9  | 32.25 |
| 540  | 5.67  | 6.95  | 8.07  | 12.27 | 12.89 | 14.57 | 18.14 | 21.85 | 20.04 | 30.28 |

|               |              |              |              |           |              |           |           |           |           |           |
|---------------|--------------|--------------|--------------|-----------|--------------|-----------|-----------|-----------|-----------|-----------|
| 550           | 5            | 6.14         | 7.14         | 11.02     | 11.6         | 13.23     | 16.59     | 20.27     | 18.45     | 28.52     |
| 560           | 4.44         | 5.45         | 6.34         | 9.89      | 10.44        | 11.95     | 15.09     | 18.73     | 16.99     | 26.85     |
| 570           | 3.88         | 4.76         | 5.54         | 8.73      | 9.25         | 10.63     | 13.59     | 17.08     | 15.45     | 25.06     |
| 580           | 3.41         | 4.16         | 4.82         | 7.65      | 8.13         | 9.39      | 12.12     | 15.47     | 13.88     | 23.15     |
| 590           | 3.1          | 3.76         | 4.33         | 6.88      | 7.31         | 8.47      | 11.02     | 14.22     | 12.68     | 21.73     |
| 600           | 2.93         | 3.54         | 4.06         | 6.44      | 6.84         | 7.93      | 10.38     | 13.47     | 11.98     | 20.83     |
| 610           | 2.85         | 3.43         | 3.92         | 6.18      | 6.57         | 7.6       | 9.99      | 13        | 11.54     | 20.22     |
| 620           | 2.79         | 3.33         | 3.78         | 5.94      | 6.3          | 7.3       | 9.59      | 12.51     | 11.09     | 19.65     |
| 630           | 2.74         | 3.27         | 3.7          | 5.78      | 6.13         | 7.11      | 9.36      | 12.23     | 10.81     | 19.23     |
| 640           | 2.82         | 3.4          | 3.84         | 6.03      | 6.39         | 7.4       | 9.72      | 12.61     | 11.18     | 19.73     |
| 650           | 3.2          | 3.86         | 4.4          | 6.92      | 7.32         | 8.45      | 11.03     | 14.04     | 12.52     | 21.43     |
| 660           | 3.92         | 4.88         | 5.58         | 8.85      | 9.3          | 10.59     | 13.58     | 16.92     | 15.25     | 24.84     |
| 670           | 5.53         | 6.76         | 7.89         | 11.89     | 12.49        | 14.16     | 17.7      | 21.27     | 19.42     | 29.59     |
| 680           | 8.08         | 9.88         | 11.39        | 16.52     | 17.15        | 19.07     | 23.09     | 26.78     | 24.95     | 35.36     |
| 690           | 12.01        | 14.27        | 16.15        | 22.1      | 22.84        | 25.06     | 29.4      | 33.12     | 31.3      | 41.5      |
| 700           | 16.94        | 19.68        | 22.04        | 28.44     | 29.23        | 31.54     | 36.1      | 39.54     | 37.96     | 47.32     |
| 710           | 22.48        | 25.57        | 28.12        | 34.61     | 35.38        | 37.86     | 42.19     | 45.36     | 43.94     | 51.83     |
| 720           | 28.03        | 31.33        | 33.99        | 40.23     | 40.99        | 43.42     | 47.35     | 50.06     | 48.89     | 55.27     |
| 730           | 32.76        | 36.11        | 38.77        | 44.63     | 45.28        | 47.51     | 51.07     | 53.25     | 52.36     | 57.43     |
| 740           | 36.64        | 40.02        | 42.53        | 47.9      | 48.44        | 50.49     | 53.61     | 55.52     | 54.8      | 58.74     |
| <b>YELLOW</b> | <b>0.25%</b> | <b>0.50%</b> | <b>0.75%</b> | <b>1%</b> | <b>1.50%</b> | <b>2%</b> | <b>3%</b> | <b>4%</b> | <b>5%</b> | <b>6%</b> |
| 360           | 5.69         | 6.72         | 7.28         | 7.73      | 8.09         | 10.84     | 11.54     | 13.57     | 15.19     | 21.92     |
| 370           | 4.49         | 5.33         | 5.77         | 6.13      | 6.46         | 8.83      | 9.5       | 11.45     | 12.94     | 19.49     |
| 380           | 3.52         | 4.19         | 4.5          | 4.78      | 5.09         | 7.08      | 7.73      | 9.61      | 11.04     | 17.49     |
| 390           | 2.95         | 3.49         | 3.68         | 3.95      | 4.2          | 5.9       | 6.5       | 8.31      | 9.58      | 16.06     |
| 400           | 2.62         | 3.08         | 3.22         | 3.43      | 3.67         | 5.2       | 5.75      | 7.55      | 8.77      | 15.36     |
| 410           | 2.58         | 3.02         | 3.17         | 3.36      | 3.59         | 5.08      | 5.61      | 7.47      | 8.68      | 15.66     |
| 420           | 2.67         | 3.13         | 3.27         | 3.47      | 3.71         | 5.26      | 5.81      | 7.7       | 8.98      | 15.99     |
| 430           | 2.96         | 3.48         | 3.66         | 3.89      | 4.15         | 5.92      | 6.52      | 8.58      | 9.91      | 17.33     |
| 440           | 3.54         | 4.15         | 4.43         | 4.71      | 5.02         | 7.13      | 7.84      | 10.16     | 11.64     | 19.63     |
| 450           | 4.48         | 5.29         | 5.68         | 6.04      | 6.41         | 9.04      | 9.91      | 12.63     | 14.38     | 22.98     |
| 460           | 6.3          | 7.42         | 7.99         | 8.48      | 8.95         | 12.34     | 13.49     | 16.66     | 18.71     | 28.1      |
| 470           | 9.68         | 11.19        | 12.12        | 12.71     | 13.3         | 17.62     | 19.06     | 22.75     | 25.13     | 35.05     |
| 480           | 16.14        | 18.04        | 19.44        | 20.18     | 20.82        | 26.08     | 27.8      | 31.9      | 34.51     | 44.28     |
| 490           | 25.07        | 27.4         | 29.03        | 29.91     | 30.61        | 36.21     | 38.06     | 41.99     | 44.49     | 52.58     |
| 500           | 37.24        | 39.69        | 41.32        | 42.13     | 42.81        | 47.8      | 49.27     | 52.14     | 53.96     | 59.07     |
| 510           | 48.45        | 50.53        | 51.92        | 52.39     | 52.85        | 56.39     | 57.1      | 58.81     | 59.92     | 62.42     |
| 520           | 55.81        | 57.37        | 58.24        | 58.58     | 58.7         | 60.88     | 60.89     | 61.76     | 62.41     | 63.55     |
| 530           | 59.52        | 60.71        | 61.28        | 61.46     | 61.39        | 62.84     | 62.44     | 62.9      | 63.28     | 63.96     |
| 540           | 61.25        | 62.22        | 62.61        | 62.74     | 62.55        | 63.72     | 63.09     | 63.46     | 63.77     | 64.11     |
| 550           | 62.15        | 63.08        | 63.32        | 63.49     | 63.23        | 64.17     | 63.47     | 63.77     | 63.97     | 64.16     |

|     |       |       |       |       |       |       |       |       |       |       |
|-----|-------|-------|-------|-------|-------|-------|-------|-------|-------|-------|
| 560 | 62.79 | 63.62 | 63.82 | 63.93 | 63.65 | 64.48 | 63.68 | 63.87 | 64.08 | 64.21 |
| 570 | 63.22 | 63.95 | 64.1  | 64.23 | 63.88 | 64.67 | 63.82 | 64.02 | 64.2  | 64.3  |
| 580 | 63.45 | 64.26 | 64.31 | 64.46 | 64.1  | 64.88 | 63.93 | 64.12 | 64.32 | 64.32 |
| 590 | 63.65 | 64.42 | 64.41 | 64.6  | 64.19 | 65.01 | 64.02 | 64.18 | 64.37 | 64.32 |
| 600 | 63.67 | 64.44 | 64.42 | 64.64 | 64.17 | 64.92 | 63.94 | 64.06 | 64.3  | 64.25 |
| 610 | 63.78 | 64.5  | 64.46 | 64.71 | 64.25 | 64.99 | 63.99 | 64.15 | 64.34 | 64.32 |
| 620 | 63.86 | 64.57 | 64.5  | 64.72 | 64.33 | 65.03 | 63.94 | 64.13 | 64.33 | 64.33 |
| 630 | 64.02 | 64.73 | 64.7  | 64.9  | 64.43 | 65.11 | 64.09 | 64.27 | 64.46 | 64.37 |
| 640 | 64.05 | 64.75 | 64.63 | 64.91 | 64.5  | 65.07 | 64.09 | 64.25 | 64.4  | 64.31 |
| 650 | 64.07 | 64.73 | 64.71 | 64.89 | 64.43 | 65.1  | 64.11 | 64.18 | 64.42 | 64.41 |
| 660 | 64.01 | 64.7  | 64.53 | 64.85 | 64.46 | 65.07 | 63.95 | 64.1  | 64.28 | 64.16 |
| 670 | 64.12 | 64.83 | 64.74 | 64.98 | 64.54 | 65.15 | 64.07 | 64.19 | 64.39 | 64.24 |
| 680 | 64.05 | 64.76 | 64.56 | 64.85 | 64.43 | 65.06 | 63.93 | 64.12 | 64.31 | 64.21 |
| 690 | 64.23 | 64.85 | 64.8  | 65.01 | 64.55 | 65.2  | 64.12 | 64.2  | 64.48 | 64.34 |
| 700 | 64.12 | 64.76 | 64.72 | 64.95 | 64.51 | 65.08 | 63.98 | 64.14 | 64.41 | 64.27 |
| 710 | 64.2  | 64.89 | 64.77 | 65.02 | 64.53 | 65.15 | 64.03 | 64.21 | 64.4  | 64.33 |
| 720 | 64.22 | 64.82 | 64.76 | 65.02 | 64.5  | 65.09 | 63.97 | 64.17 | 64.34 | 64.34 |
| 730 | 64.22 | 64.83 | 64.74 | 64.96 | 64.55 | 65.1  | 64    | 64.14 | 64.36 | 64.27 |
| 740 | 64.15 | 64.85 | 64.74 | 64.94 | 64.46 | 65.11 | 63.99 | 64.15 | 64.35 | 64.3  |

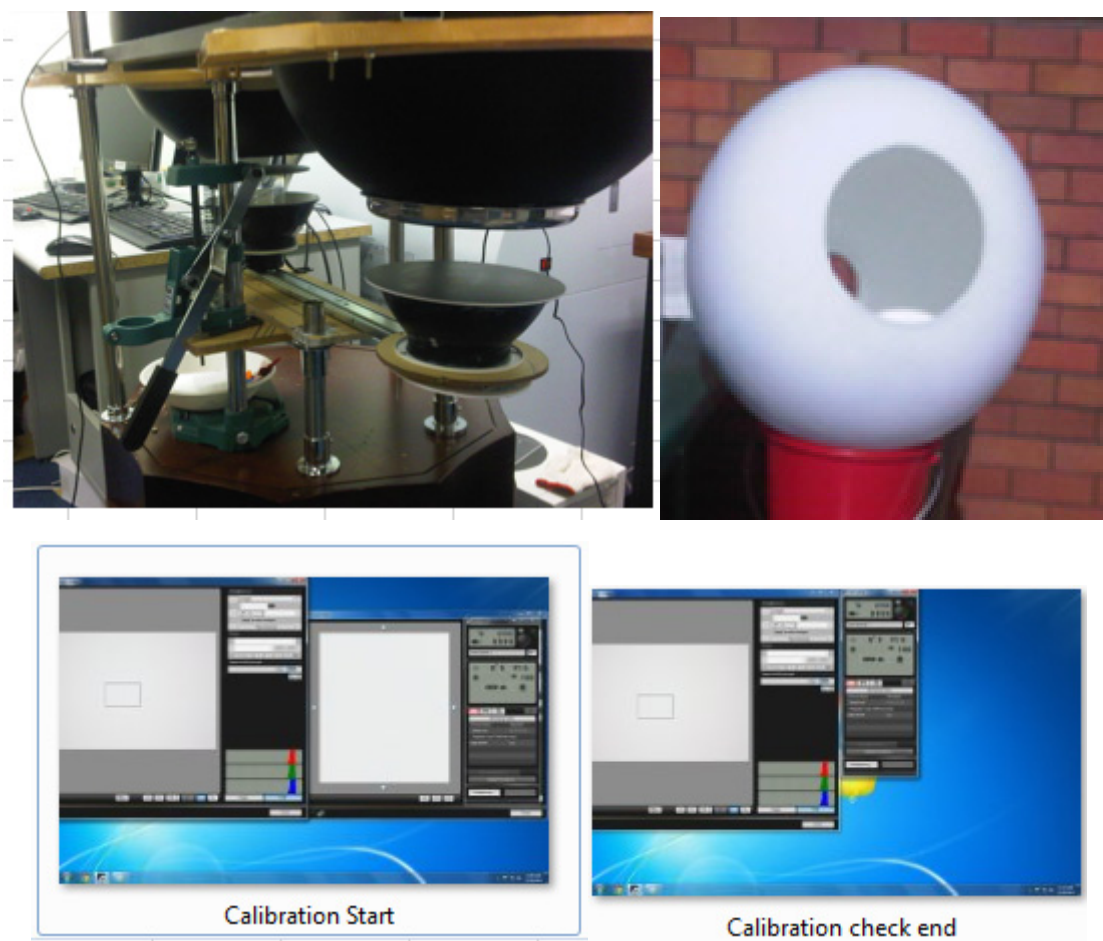

[ Figure S3. System set-up and calibration ]
